# Supplementary material for: Mammographic Density and Screening Sensitivity, Breast Cancer Incidence and Associated Risk Factors in Danish Breast Cancer Screening
Source: MDPI journal article supplement (doi:10.3390/jcm8112021), 2019-11-19
Supplement: s1 [file s1]

**Supplementary Table 1.** Data sources used in Danish studies on mammographic density.

| Reference                                                              | Year and location                     | Type of density data  | Study design                                                        | Risk factor studied | Risk factor data                                | Follow-up data      | Screening outcome                                    | Interval cancers       | Outcome measure                                                           |
|------------------------------------------------------------------------|---------------------------------------|-----------------------|---------------------------------------------------------------------|---------------------|-------------------------------------------------|---------------------|------------------------------------------------------|------------------------|---------------------------------------------------------------------------|
| Studies on sensitivity/specificity by density                          |                                       |                       |                                                                     |                     |                                                 |                     |                                                      |                        |                                                                           |
| Olsen et al, 2009 (4)                                                  | 1991-2001 Copenhagen                  | Fatty and Mixed/dense | Cohort to 2001                                                      | NA                  | NA                                              | Population register | Screening program database                           | Danish Cancer Register | Sensitivity                                                               |
| Von Euler-Chelpin et al, 2018 (7)                                      | 2012-2013 Capital Region              | BI-RADS, version 4    | Cross sectional                                                     | NA                  | NA                                              | NA                  | Screening program database                           | Danish Cancer Register | Sensitivity, specificity                                                  |
| Study on prevalence of fatty and of mixed/dense breast by birth cohort |                                       |                       |                                                                     |                     |                                                 |                     |                                                      |                        |                                                                           |
| Hellmann et al, 2013 (5)                                               | 1991-2001 Copenhagen and Funen county | Fatty and Mixed/dense | Time trend                                                          | Hormone therapy     | Drug Prescription database                      | NA                  | NA                                                   | NA                     | Prevalence of fatty and mixed/dense                                       |
| Studies on risk factors for mixed/dense breasts                        |                                       |                       |                                                                     |                     |                                                 |                     |                                                      |                        |                                                                           |
| Azam et al, 2018 (15)                                                  | 1993-1997 Copenhagen                  | Fatty and Mixed/dense | Cross sectional                                                     | Physical activity   | Diet, Cancer, Health cohort                     | NA                  | NA                                                   | NA                     | Odds ratio for mixed/dense exposed vs non-exposed                         |
| Azam et al, 2018 (12)                                                  | 1993-1997 Copenhagen                  | Fatty and Mixed/dense | 1)Cross sectional for density<br>2)Cohort for breast cancer to 2010 | Hormone therapy     | Diet, Cancer, Health cohort                     | Population register | Breast cancer incidence data: Danish Cancer Register |                        | 1)Odds ratio for mixed/dense<br>2)Hazard ratio for incident breast cancer |
| Roswall et al, 2018 (16)                                               | 1993-1997 Copenhagen                  | Fatty and Mixed/dense | Cross sectional                                                     | Traffic noise       | Modelled traffic noise 5 years before mammogram | NA                  | NA                                                   | NA                     | Odds ratio for mixed/dense per quartile of exposure                       |
| Jacobsen et al, 2017 (17)                                              | 1993-1997 Copenhagen                  | Fatty and Mixed/dense | Cross sectional                                                     | Alcohol consumption | Diet, Cancer, Health                            | NA                  | NA                                                   | NA                     | Odds ratio for mixed/dense exposed vs non-exposed                         |

|                                               |                          |                       |                 |                             |                                     |                     |                                                |                        |                                                                          |
|-----------------------------------------------|--------------------------|-----------------------|-----------------|-----------------------------|-------------------------------------|---------------------|------------------------------------------------|------------------------|--------------------------------------------------------------------------|
| Buschard et al, 2017 (13)                     | 1993-1997 Copenhagen     | Fatty and Mixed/dense | Cross sectional | Diabetes                    | Diet, Cancer, Health                | NA                  | NA                                             | NA                     | Odds ratio for mixed/dense exposed vs non-exposed                        |
| Jacobsen et al, 2016 (14)                     | 1993-1997 Copenhagen     | Fatty and Mixed/dense | Cross sectional | Cigarette smoking           | Diet, Cancer, Health                | NA                  | NA                                             | NA                     | Odds ratio for mixed/dense exposed vs non-exposed                        |
| Huynh et al, 2015 (18)                        | 1993-1997 Copenhagen     | Fatty and Mixed/dense | Cross sectional | Air pollution               | Modelled nitrogen oxide 1971-1993/7 | NA                  | NA                                             | NA                     | Odds ratio for mixed/dense per 20 µg/m <sup>3</sup> of exposure          |
| Studies on breast cancer incidence by density |                          |                       |                 |                             |                                     |                     |                                                |                        |                                                                          |
| Olsen et al, 2009 (4)                         | 1991-2001 Copenhagen     | Fatty and Mixed/dense | Cohort to 2001  | NA                          | NA                                  | Population register | Breast cancer incidence Danish Cancer Register |                        | Rate ratio for breast cancer, mixed/dense vs fatty                       |
| Von Euler-Chelpin et al, 2018 (7)             | 2012-2013 Capital Region | BI-RADS version 4     | Cross sectional | NA                          | NA                                  | NA                  | Screening program database                     | Danish Cancer Register | Relative risk for breast cancer, baseline BI-RADS 1                      |
| Andersen et al, 2014 (10)                     | 1991- Copenhagen         | Fatty and Mixed/dense | Cohort to 2009  | Childhood body constitution | School Health register              | Population register | Breast cancer incidence Danish Cancer register |                        | Rate ratio for breast cancer by body constitution controlled for density |
